# Supplementary material for: A reconfigurable, healable and recyclable 3D printed orthosis for adolescent idiopathic scoliosis
Source: Royal Society of Chemistry journal article supplement (doi:10.1039/d4qm00275j), 2024-01-01
Supplement: d4qm00275j1.pdf [file d4qm00275j1.pdf]

1  
2  
3  
4  
5  
6  
7  
8  
9  
10  
11  
12  
13  
14  
15  
16  
17  
18  
19  
20  
21  
22  
23  
24  
25  
26  
27  
28  
29

**Supplementary Information for**

**A reconfigurable, healable and recyclable 3D printed orthosis for adolescent  
idiopathic scoliosis**

Xiu-Chong He <sup>a,1</sup>, Jian-Cheng Lai <sup>a,c,d,1</sup>, Peng-Fei Zheng <sup>b,\*</sup>, Cheng-Hui Li <sup>a,\*</sup>

<sup>a</sup> State Key Laboratory of Coordination Chemistry, School of Chemistry and Chemical Engineering, Nanjing National Laboratory of Microstructures, Collaborative Innovation Center of Advanced Microstructures, Nanjing University, Nanjing 210023, P. R. China.

<sup>b</sup> Department of Orthopaedic Surgery, Children's Hospital of Nanjing Medical University, Nanjing 210000, Jiangsu Province, China

<sup>c</sup> Beijing Institute of Collaborative Innovation, Beijing 100094, P. R. China

<sup>d</sup> Tachin Technology Co., Ltd., Beijing 100094, P. R. China

\* Corresponding authors.

E-mail addresses: [chli@nju.edu.cn](mailto:chli@nju.edu.cn) (C.-H. Li), [zhengpengfei@njmu.edu.cn](mailto:zhengpengfei@njmu.edu.cn) (P.-F. Zheng);

<sup>1</sup> The authors equally contribute to manuscript.

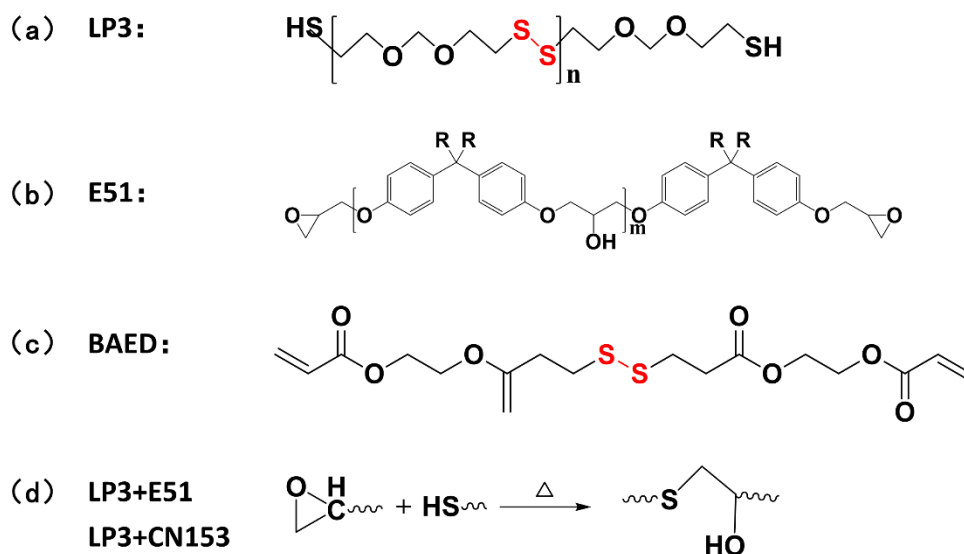

30

31 **Fig. S1.** The molecular structure of these components containing dynamic bonds. (a)  
 32 The molecular structure of LP3. (b) The molecular structure of E51. (c) The molecular  
 33 structure of BAED. (d) Reaction of LP3 with E51 or LP3 with CN153.

34 Excellent exchange ability of S-S bond in Liquid thiol-terminated polysulfide  
 35 oligomer (LP3) and Bis (2-(acryloyloxy) ethyl) dithiodipropionate (BAED) had  
 36 been proved.<sup>S1-S2</sup> In this work, we attempt to blend them into 3D printing resin to obtain  
 37 the characteristics brought by dynamic bonds, as shown in Fig S1. In theory, the  
 38 prepared 3D printing resin should exhibit characteristics such as self-healing,  
 39 reprocessing, solubility, and variable stiffness. But in reality, these above  
 40 characteristics have almost completely disappeared.

41

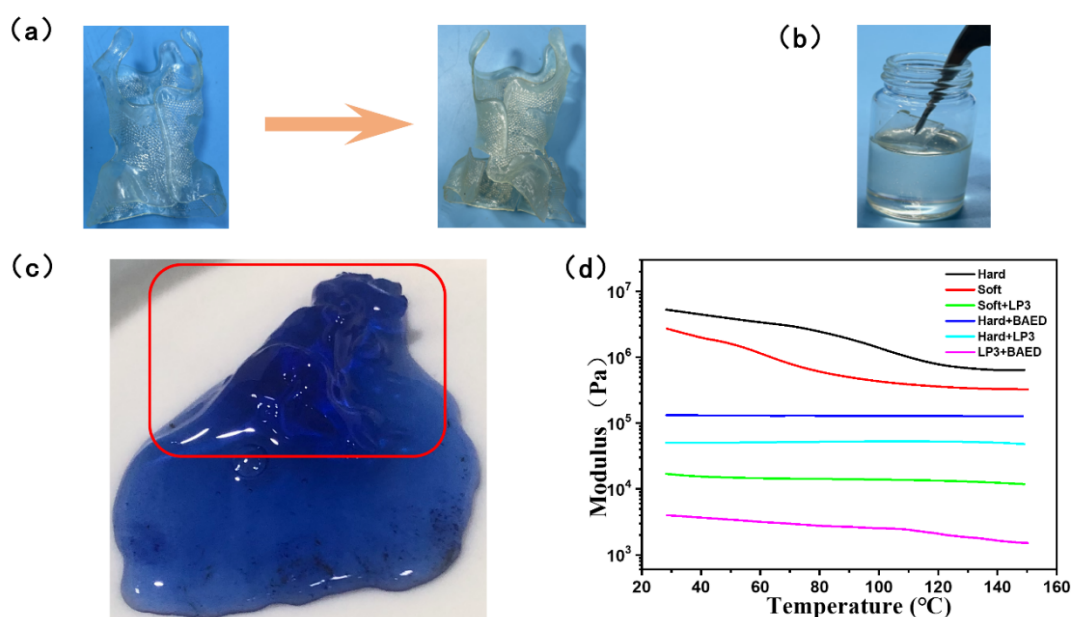

42

43 **Fig. S2.** Properties of 3D printed materials with dynamic bonds. (a) Test the healable  
 44 property of printed orthoses. (b) Soaked in the mixture of LP3 and acetone (1:1) for 168  
 45 h at 80 °C. (c) The reprocessing performance in 150 °C for 60min. (d) Modulus-  
 46 temperature curves of several 3D printed materials.

47 It can be seen from Fig. S2 that, despite the addition of a large amount of LP3, the  
 48 relevant characteristics brought about by dynamic bonding completely disappeared. It  
 49 is obvious that the sample can not be healed even heated for 24 h (Fig. S2a). But in the  
 50 thermal curing system, the same reaction between thiol and epoxy functional groups,  
 51 relying on S-S exchange, it only takes 2 h to be completely healed at 75 °C.<sup>S1</sup> In the  
 52 thermal curing system, it can be dissolved by soaking in the mixture of LP3 and acetone  
 53 (1:1) for 24 h. But the 3D printed materials cannot be dissolved even after soaked for  
 54 168 h (Fig. S2b). In the original thermal curing system, it can be reshaped by heating  
 55 at 75 °C for 20 mins. However, in 3D printing, the printed structure (the model inside  
 56 the red line) was not damaged even heated at 150 °C for 60 mins, making it impossible  
 57 to reprocess (Fig. S2c). The modulus of these 3D printed models decreases by only two  
 58 orders of magnitude with the temperature from 28 °C to 150 °C, and there is no sharp  
 59 drop (Fig. S2d). Whether it is hard or soft resin, there is no variable stiffness  
 60 performance. These phenomena and data all illustrate that the activity of dynamic bonds  
 61 in 3D printing materials were inhibited.

62

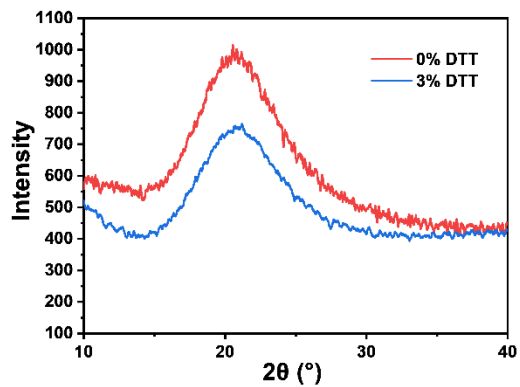

63

64

65 **Fig. S3.** XRD test of polymers with different DTT content.

66 Because the 3D printing resin was a mixture of monomers and oligomers, and S-S  
67 and S-H caused a complex exchange, the molecular formed an irregular structure. XRD  
68 shows that there is no obvious crystal structure.

69

70

71

72

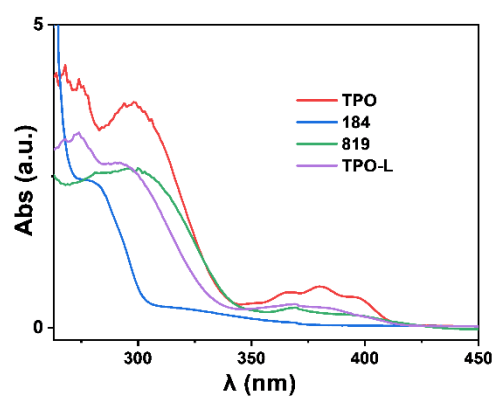

73

74 **Fig. S4.** Ultraviolet absorption spectra of TPO and other UV initiators. The initiator  
75 TPO exhibits better absorption in the UV light region. It ensures that 3D printing resins  
76 can be quickly cured in UV light.

77

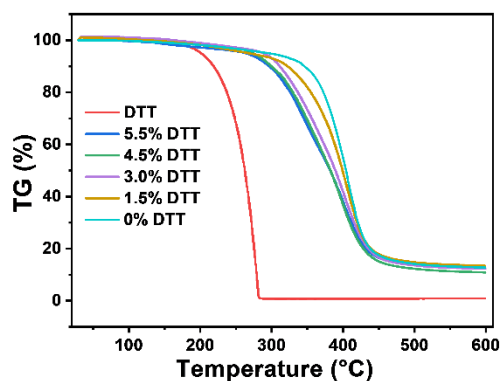

78

79 **Fig. S5.** Thermogravimetric comparison of polymers with different DTT content.

80 The pure DTT small molecules began to decompose at 165 °C, but after exchanging  
 81 with LP3, a series of short-chain polymers were formed, and the decomposition  
 82 temperature increased to 260 °C, and the decomposition temperature increased with the  
 83 increase of the proportion of macromolecules. This proves that DTT forms a complex  
 84 exchange with LP3, eventually forming a series of polymers with different chain  
 85 lengths and dynamic bonds.

86

87

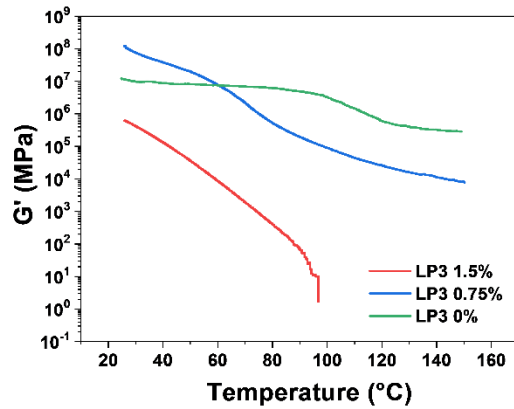

88

89 **Fig. S6.** Effects of LP3 ratio on the modulus-temperature curves.

90 Without the addition of LP3, the decrease of modulus is very slow under the  
 91 condition of the existence of DTT, and the modulus at room temperature will be slightly  
 92 increased. This is because LP3 reacts with epoxy to increase the crosslinking density.  
 93 When the dosage of LP3 reaches 1.5%, the decreasing rate of modulus increases, but  
 94 the initial modulus also decreases. It is therefore recommended that no more than 1.5%  
 95 LP3 may be suitable.

96

97

98

99

100

101

102

103

104

105

106

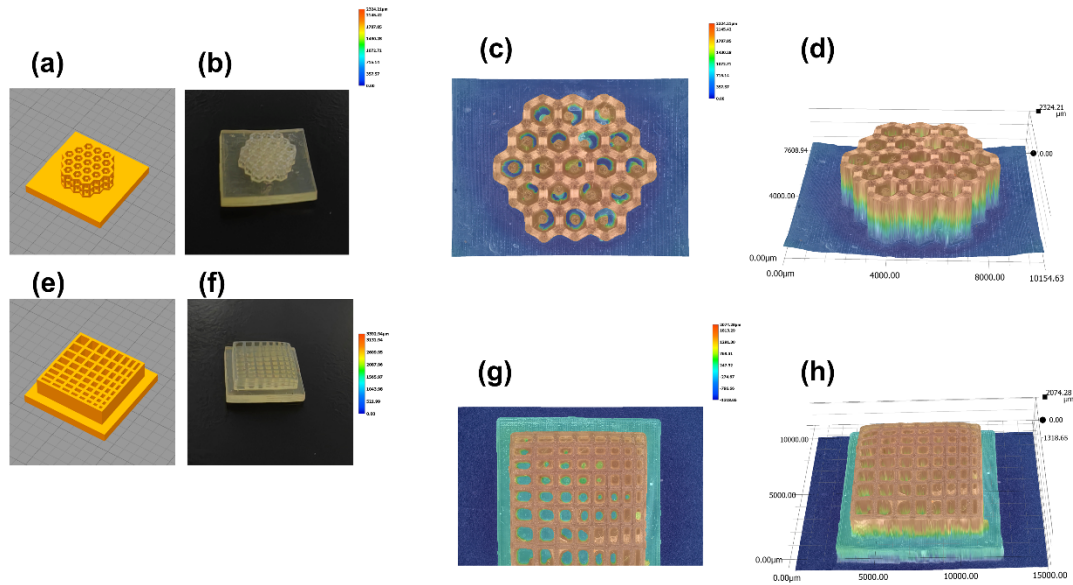

107

108 **Fig. S7.** Other models with complex pattern, printed samples, and the confocal laser  
 109 testing for them. (a) & (e) Models with complex patterns. (b) & (f) Printed samples. (c)  
 110 & (g) Top view of the models. (d) & (h) Side view of the models.

111 Some complex structures are printed (Fig. S7), which show high printing precision  
 112 and clear microstructure. It is indicated that this resin is suitable for printing various  
 113 models.

114

115

116

117

118

119

120



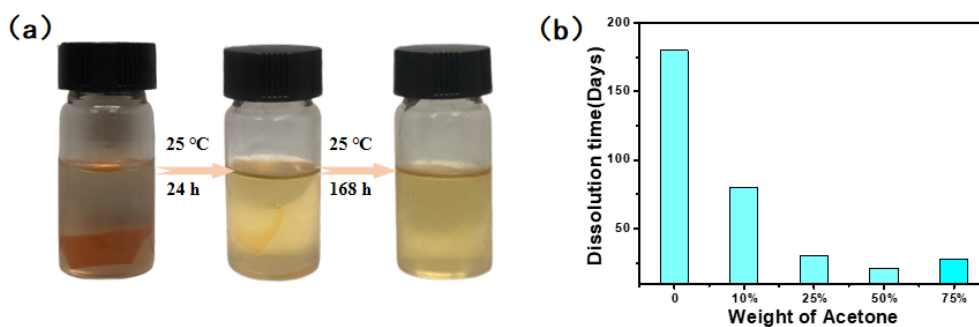

121

122 **Fig. S8.** Solubility of 3D printed materials. (a) Dissolution of 3D printed materials in  
 123 acetone solution containing 50% LP3. (b) The relationship between dissolution time  
 124 and acetone content.

125 The printed material can be dissolved in LP3/acetone solution after 168h at 25°C  
 126 (Fig. S8a). The dissolution time was related to the content of LP3. When the content of  
 127 LP3 is very low, it hardly dissolves. With the increase of LP3 content, the dissolution  
 128 rate increases. However, when the content of LP3 exceeds 75%, the dissolution rate  
 129 will decrease. This is because acetone has the swelling effect, can promote the -SH  
 130 more easily into the polymer crosslinking network, causing it easier for dynamic  
 131 exchange (Fig. S8b).

132

133

134

135

136

137

138

139 **Table S1.** The feed ratio of 3D printing resin prepared with conventional methods

| Sample    | CN153<br>(g) | LP3<br>(g) | ACMO<br>(g) | BAED<br>(g) | E51<br>(g) | TPO<br>(g) | Inhibitor<br>(mg) |
|-----------|--------------|------------|-------------|-------------|------------|------------|-------------------|
| Hard      | 40           | 0          | 40          | 0           | 0          | 3          | 1                 |
| Soft      | 40           | 0          | 20          | 0           | 20         | 3          | 1                 |
| Soft+LP3  | 40           | 50         | 20          | 0           | 20         | 3          | 1                 |
| Hard+BAED | 40           | 0          | 40          | 50          | 0          | 3          | 1                 |
| Hard+LP3  | 40           | 50         | 40          | 0           | 0          | 3          | 1                 |
| BAED+LP3  | 0            | 50         | 50          | 50          | 0          | 3          | 1                 |

140

141

142

143

144 **Table S2.** The feed ratio of 3D printing resin for comparison in this work.

145

| Sample        | CN153<br>(wt%) | LP3<br>(wt%) | ACMO<br>(wt%) | DTT<br>(wt%) | CN983<br>(wt%) | TPO<br>(wt%) | Inhibitor<br>ppm |
|---------------|----------------|--------------|---------------|--------------|----------------|--------------|------------------|
| AA-SS-ACMO-1  | 80             | 9            | 0             | 3            | 5              | 3            | 10               |
| AA-SS-ACMO-2  | 60             | 9            | 20            | 3            | 5              | 3            | 10               |
| AA-SS-ACMO-3  | 30             | 9            | 50            | 3            | 5              | 3            | 10               |
| AA-SS-ACMO-4  | 9              | 5            | 75            | 3            | 5              | 3            | 10               |
| AA-SS-ACMO-5  | 2.5            | 1.5          | 85            | 3            | 5              | 3            | 10               |
| AA-SS-CN983-1 | 34             | 10           | 50            | 3            | 0              | 3            | 10               |
| AA-SS-CN983-2 | 31             | 10           | 50            | 3            | 3              | 3            | 10               |
| AA-SS-CN983-3 | 33             | 5            | 50            | 3            | 6              | 3            | 10               |
| AA-SS-CN983-4 | 30             | 5            | 50            | 3            | 9              | 3            | 10               |
| AA-SS-CN983-5 | 27             | 5            | 50            | 3            | 12             | 3            | 10               |
| AA-SS-DTT-1   | 32             | 10           | 50            | 0            | 5              | 3            | 10               |
| AA-SS-DTT-2   | 30             | 10           | 50            | 2            | 5              | 3            | 10               |
| AA-SS-DTT-3   | 28             | 10           | 50            | 4            | 5              | 3            | 10               |
| AA-SS-DTT-4   | 26             | 10           | 50            | 6            | 5              | 3            | 10               |
| AA-SS-DTT-5   | 24             | 10           | 50            | 8            | 5              | 3            | 10               |

146

147

148

149 **Supplementary Reference**

- 150 [S1] W. Gao, M. Bie, F. Liu, P. Chang, Y. Quan, Self-Healable and Reprocess  
151 able Polysulfide Sealants Prepared from Liquid Polysulfide Oligomer and E  
152 poxy Resin, *ACS Appl. Mater. Interfaces*, 2017, **9**, 15798-15808.
- 153 [S2] L. Zhang, T. Qiu, Z. Zhu, L. Guo, X. Li, Self-Healing Polycaprolactone Networks  
154 through Thermo-Induced Reversible Disulfide Bond Formation, *Rapid Commun.*,  
155 2018, **39**, 1800121.
